# Supplementary material for: Xanthones from the Bark of Garcinia xanthochymus and the Mechanism of Induced Apoptosis in Human Hepatocellular Carcinoma HepG2 Cells via the Mitochondrial Pathway
Source: MDPI journal article supplement (doi:10.3390/ijms20194803), 2019-09-27
Supplement: s1 [file s1]

# Xanthones from the Bark of *Garcinia xanthochymus* and the Mechanism of Induced Apoptosis in Human Hepatocellular Carcinoma HepG2 Cells via the Mitochondrial Pathway

Shan Jin <sup>1</sup>, Kuan Shi <sup>1</sup>, Liu Liu <sup>2</sup>, Yu Chen <sup>2</sup> and Guangzhong Yang <sup>1,\*</sup>

<sup>1</sup> School of Pharmaceutical Sciences, South-Central University for Nationalities, Wuhan 430074, China

<sup>2</sup> College of Chemistry and Material Sciences, South-Central University for Nationalities, Wuhan 430074, China

\* Correspondence: yangguangzhong@mail.scuec.edu.cn; Tel.: +86-27-67841196

## Electronic Supplementary Information

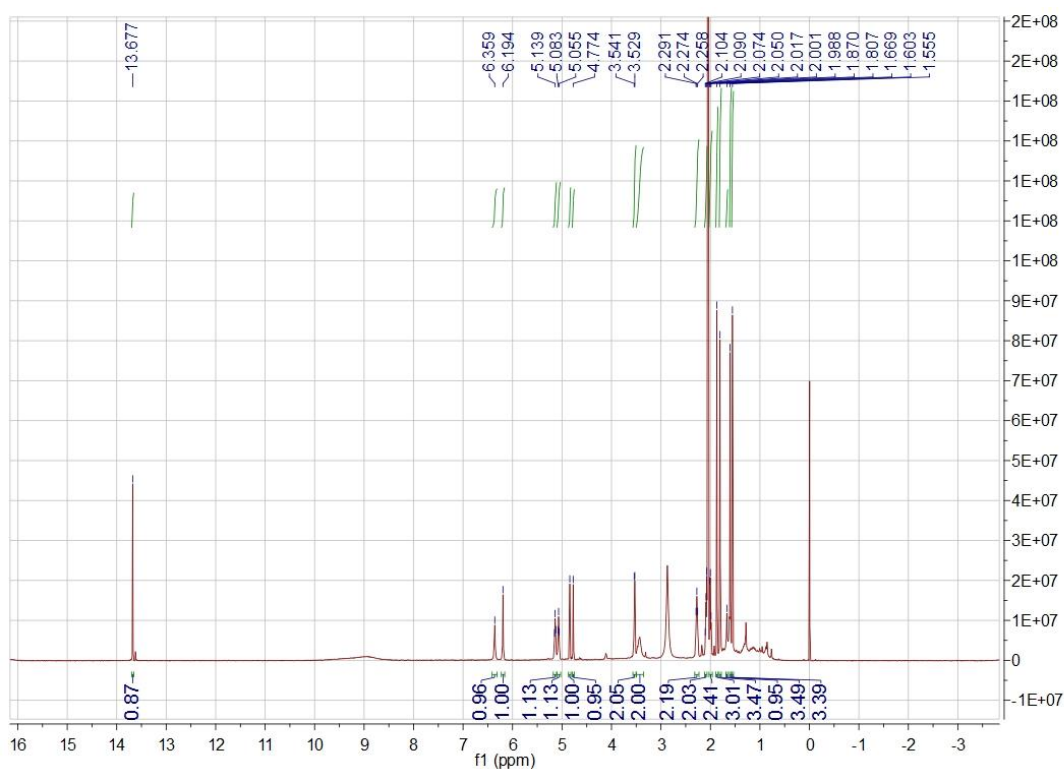

Figure S1. <sup>1</sup>H-NMR spectrum of compound 1.

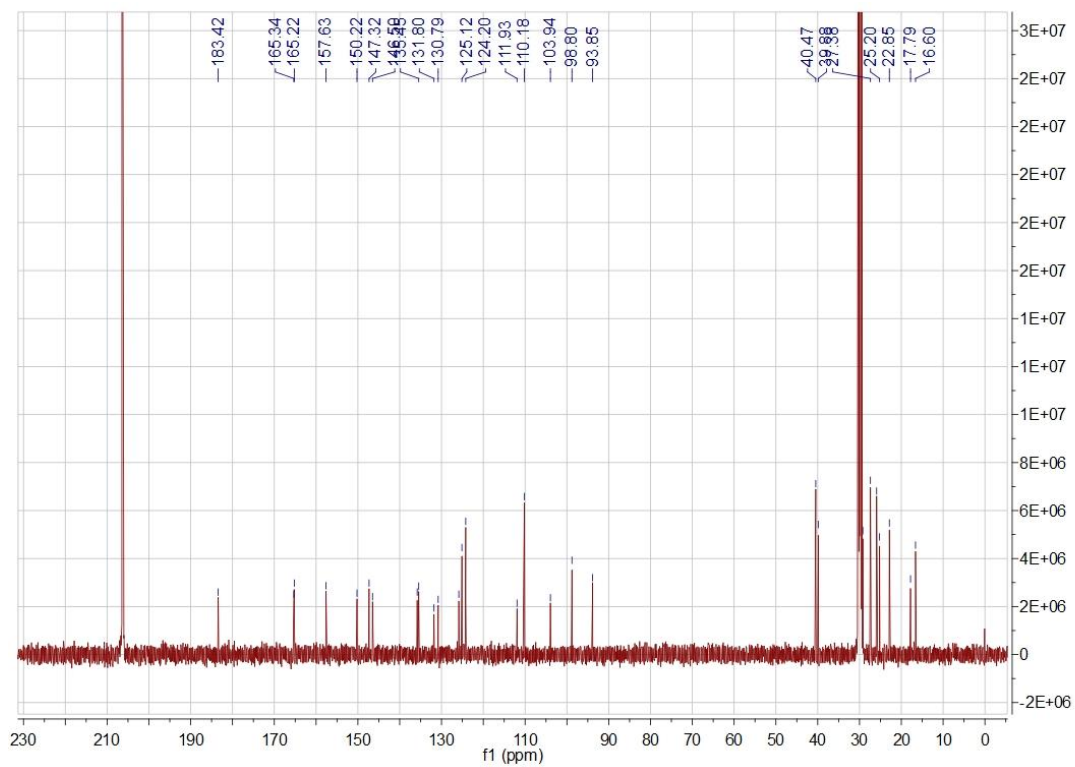

Figure S2.  $^{13}\text{C}$ -NMR spectrum of compound 1.

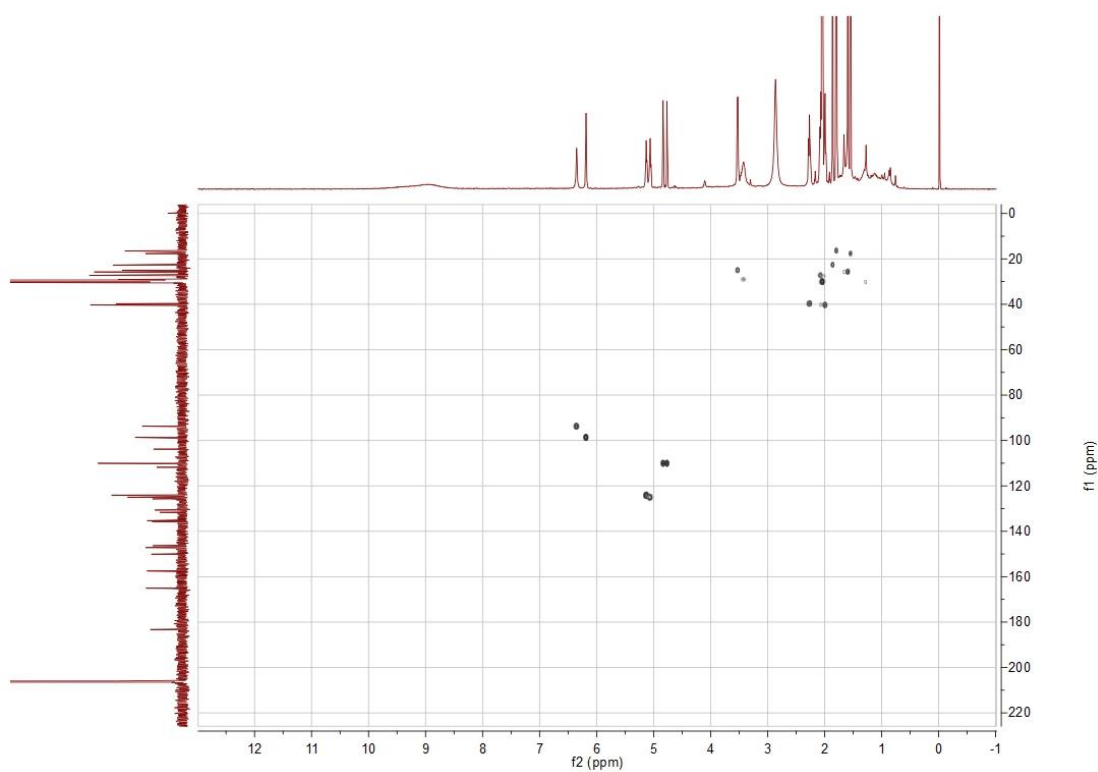

Figure S3. HSQC spectrum of compound 1.

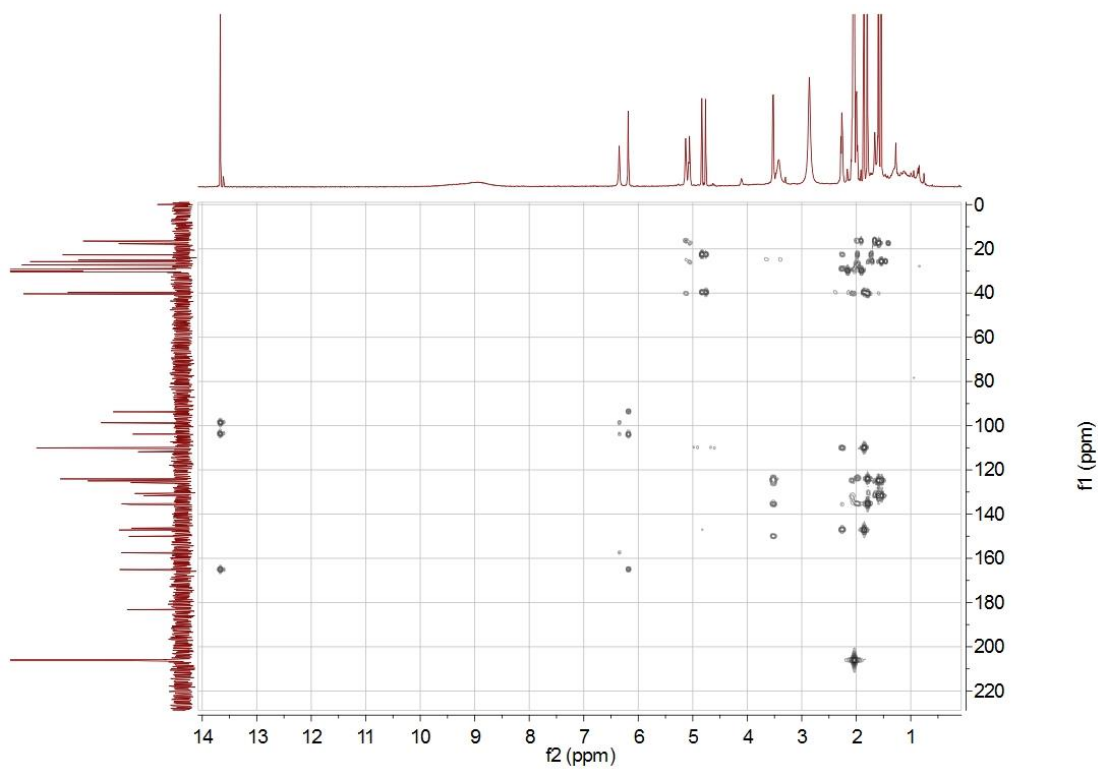

Figure S4. HMBC spectrum of compound 1.

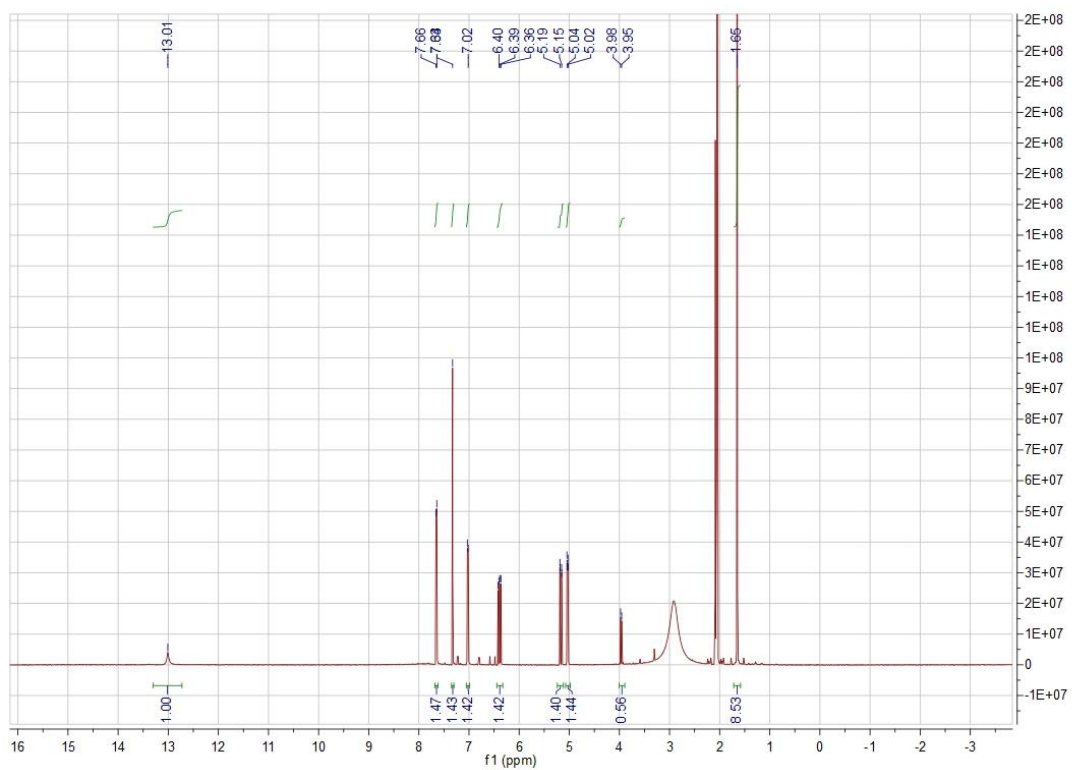

Figure S5.  $^1\text{H}$ -NMR spectrum of compound 2.

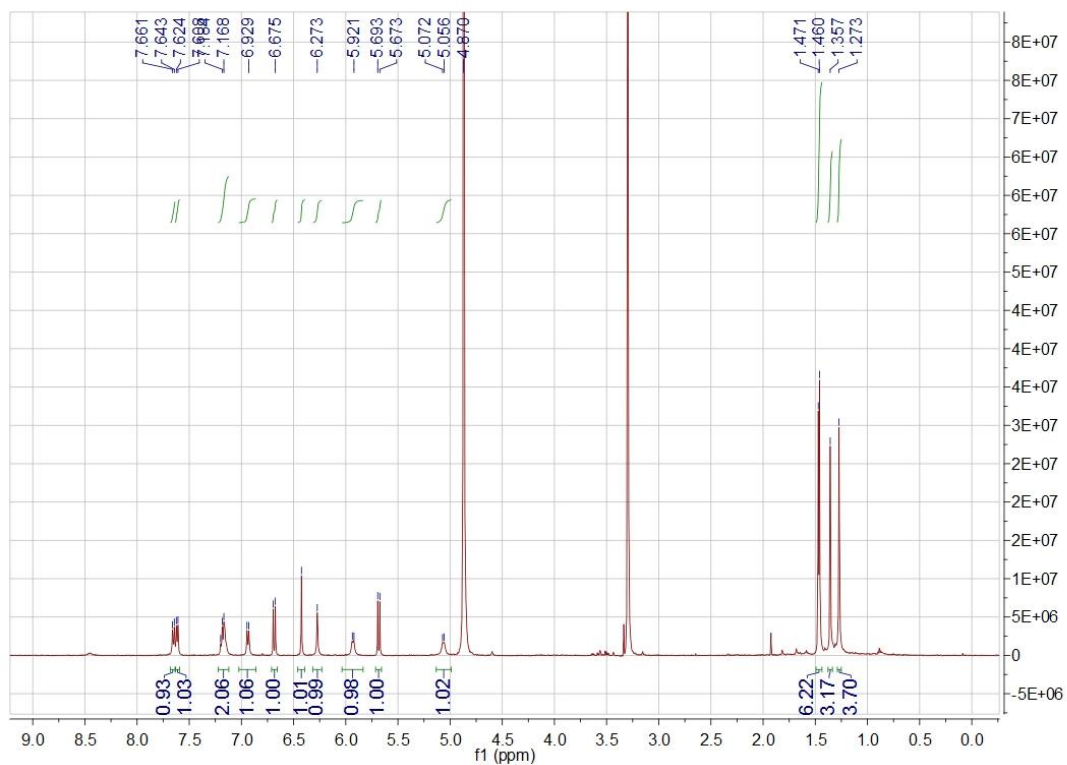

Figure S6.  $^1\text{H-NMR}$  spectrum of compound 3.

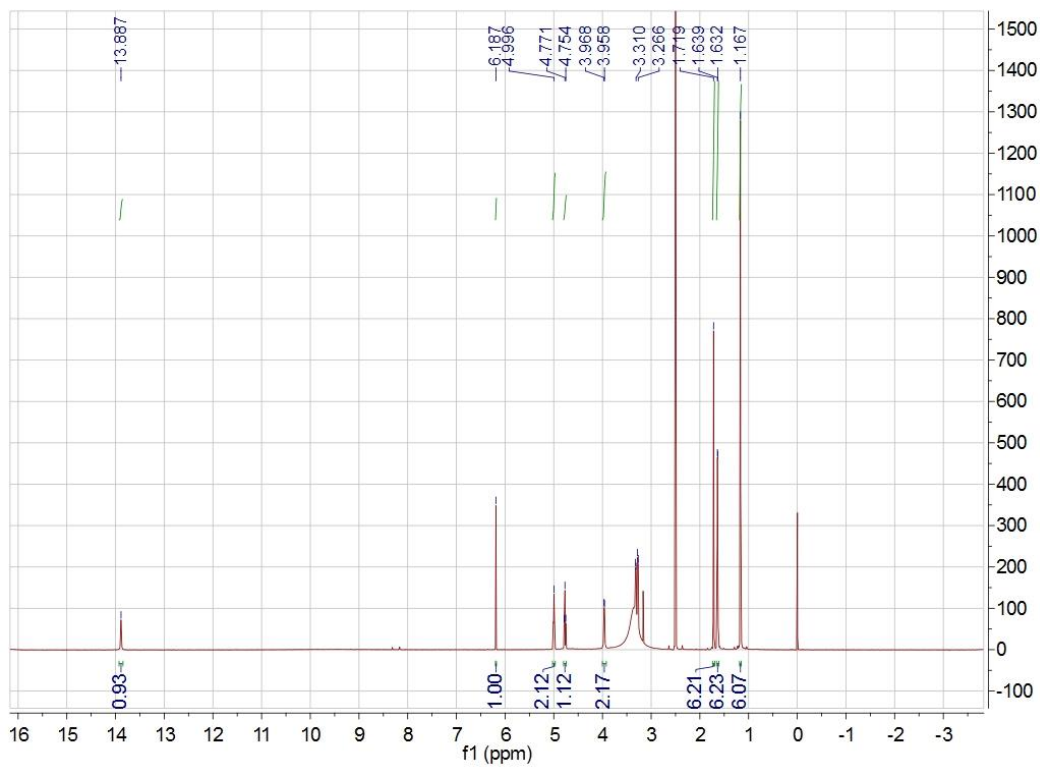

Figure S7.  $^1\text{H-NMR}$  spectrum of compound 4.

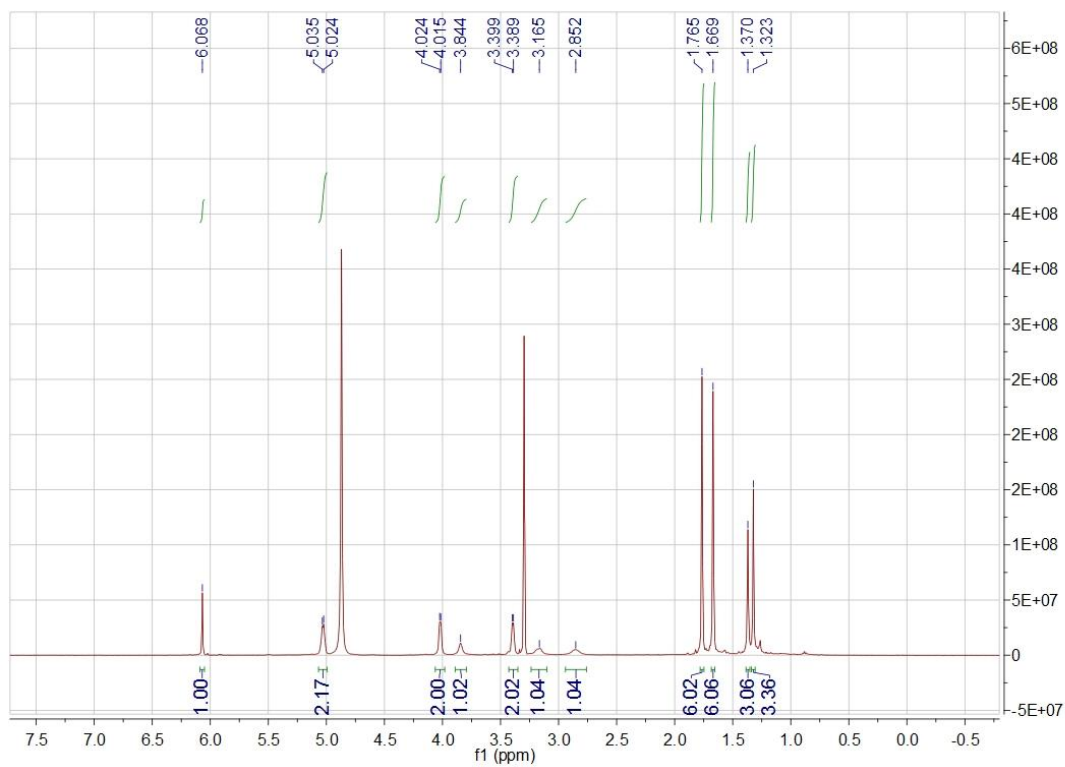

Figure S8. <sup>1</sup>H-NMR spectrum of compound 5.

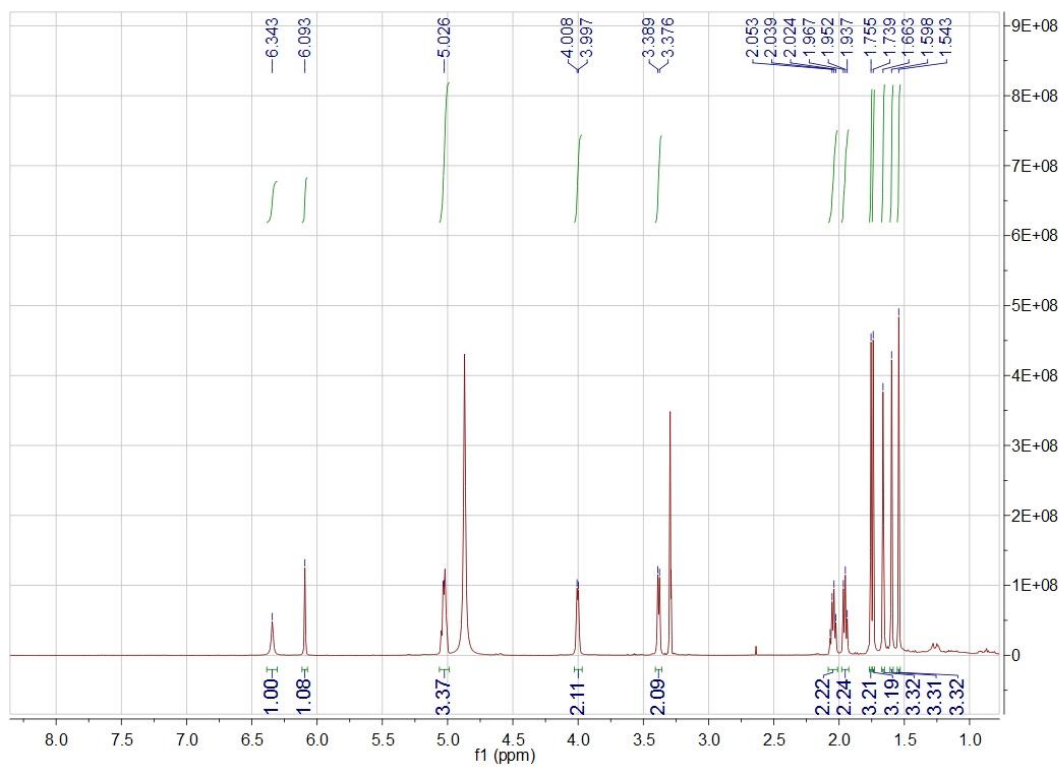

Figure S9. <sup>1</sup>H-NMR spectrum of compound 6.

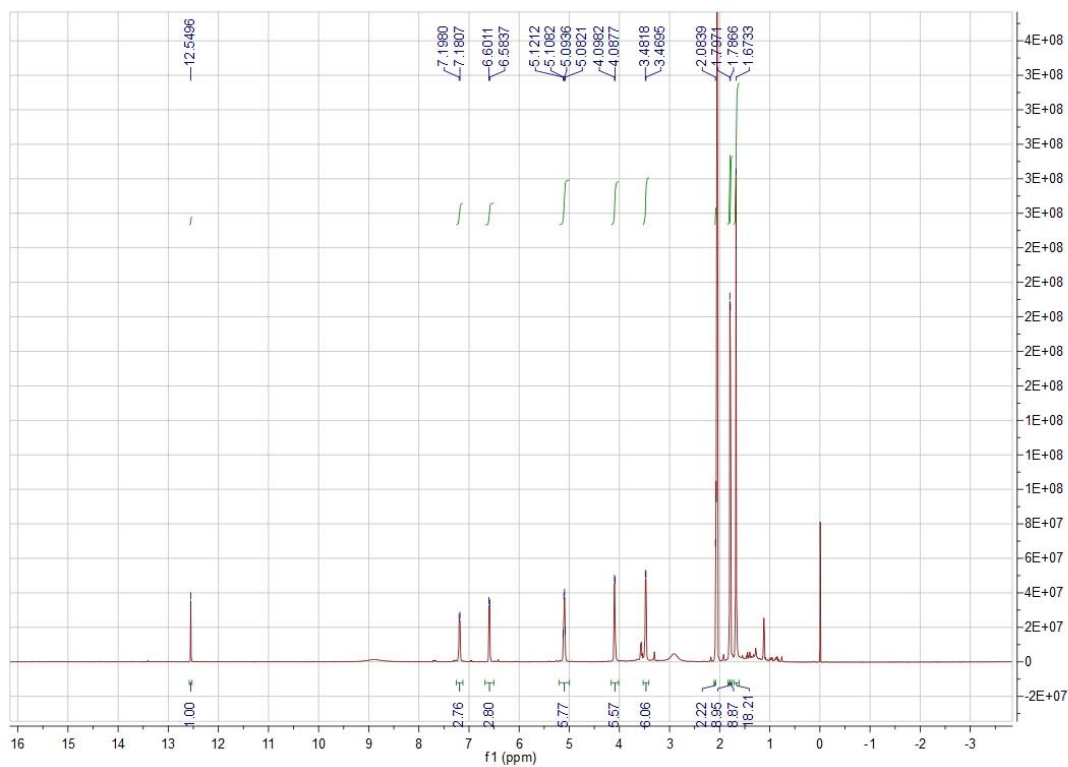

Figure S10. <sup>1</sup>H-NMR spectrum of compound 7.

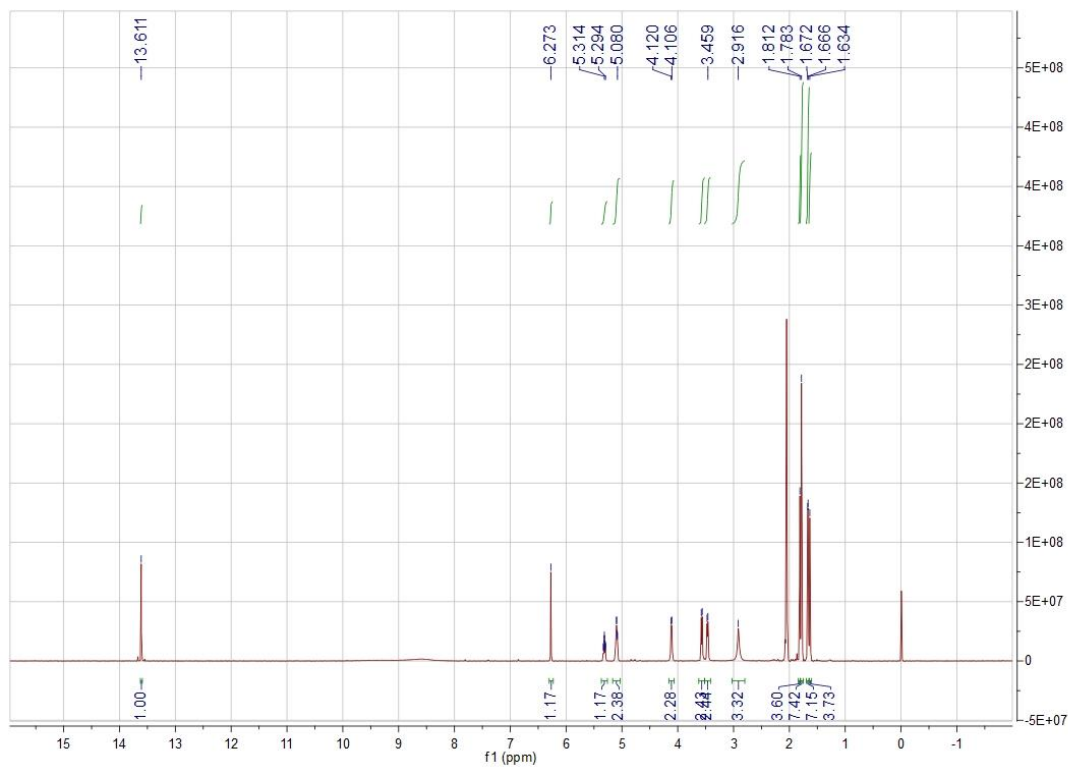

Figure S11. <sup>1</sup>H-NMR spectrum of compound 8.

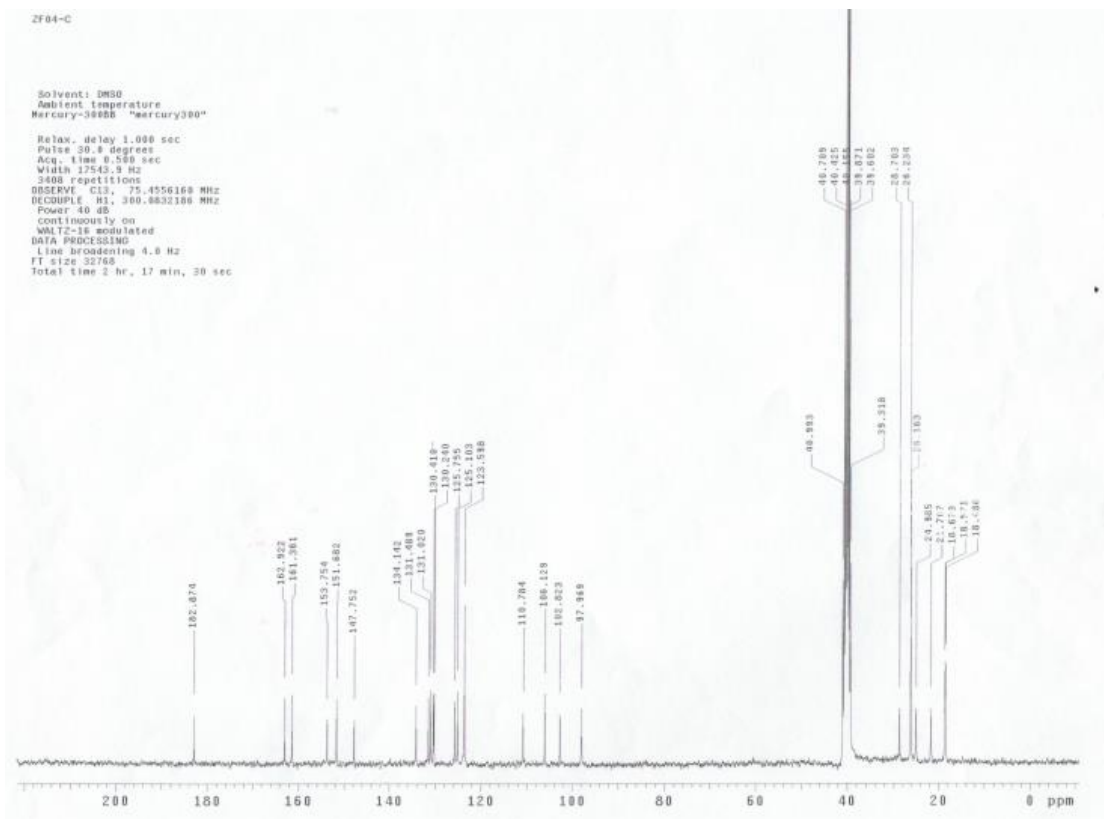

Figure S12.  $^{13}\text{C}$ -NMR spectrum of compound 8.

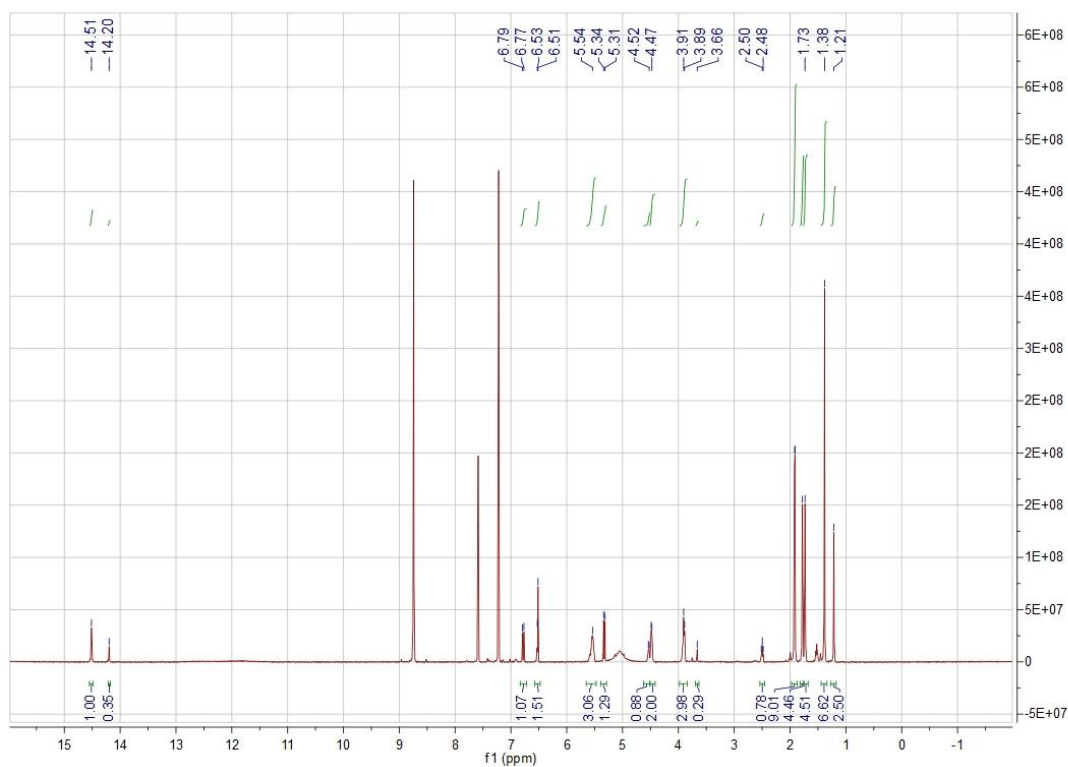

Figure S13.  $^1\text{H}$ -NMR spectrum of compound 9.

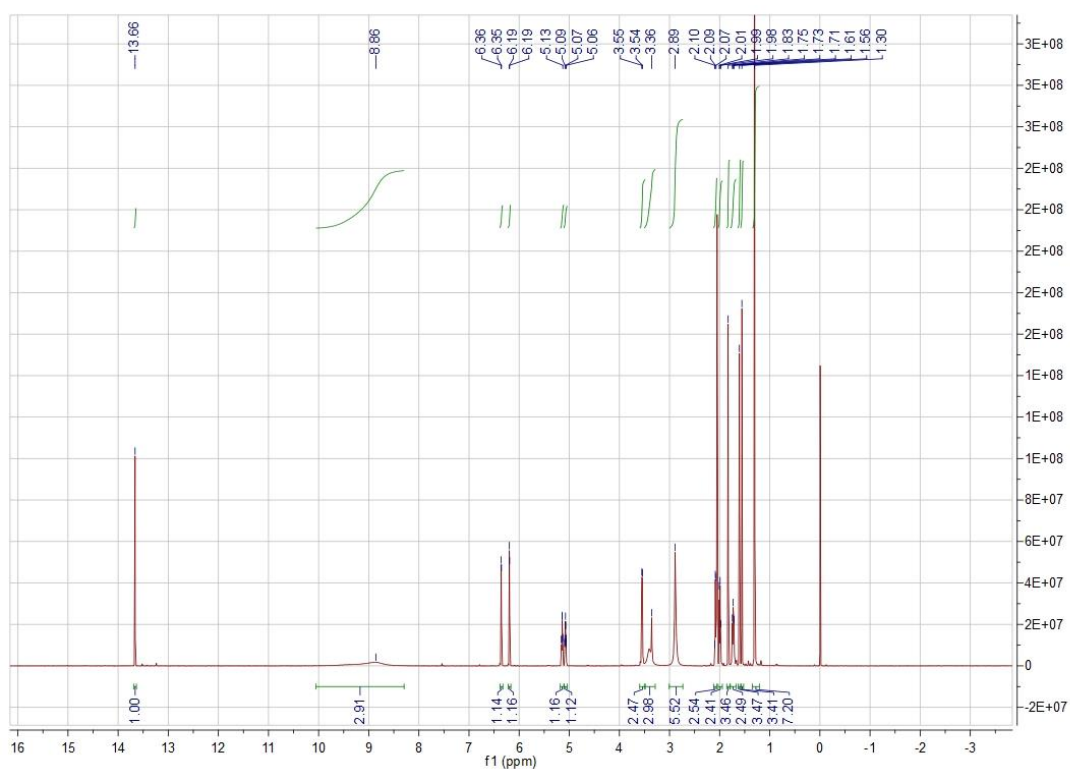

Figure S14. <sup>1</sup>H-NMR spectrum of compound 10.

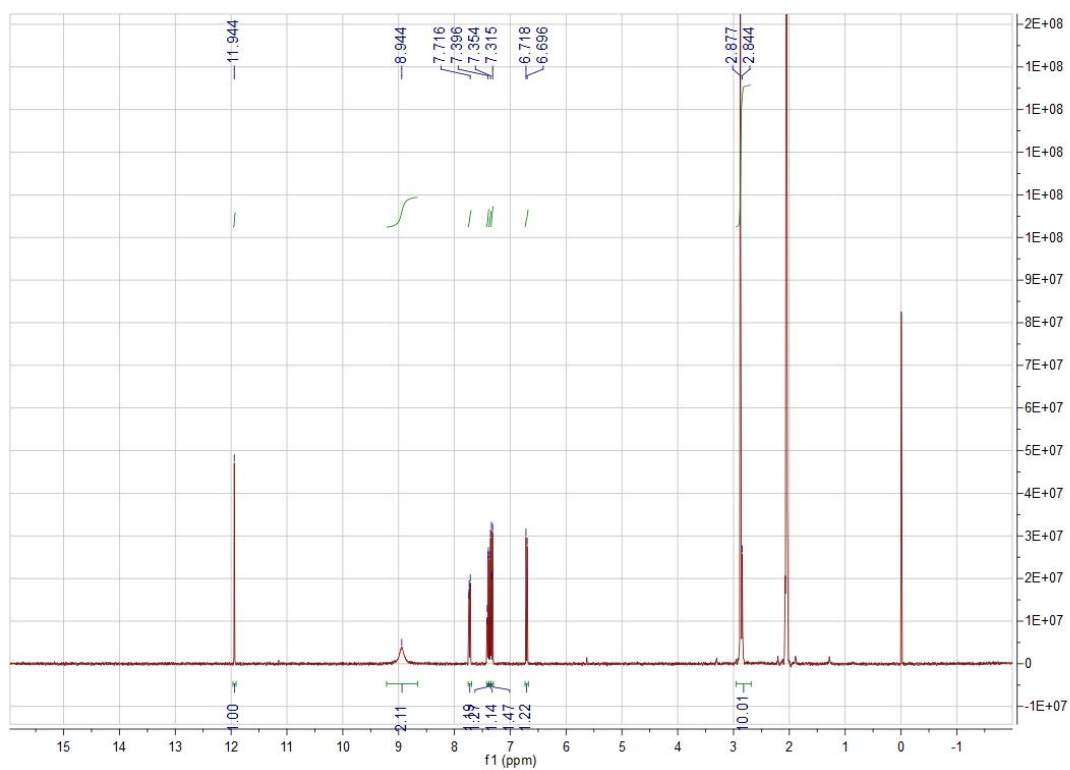

Figure S15. <sup>1</sup>H-NMR spectrum of compound 11.



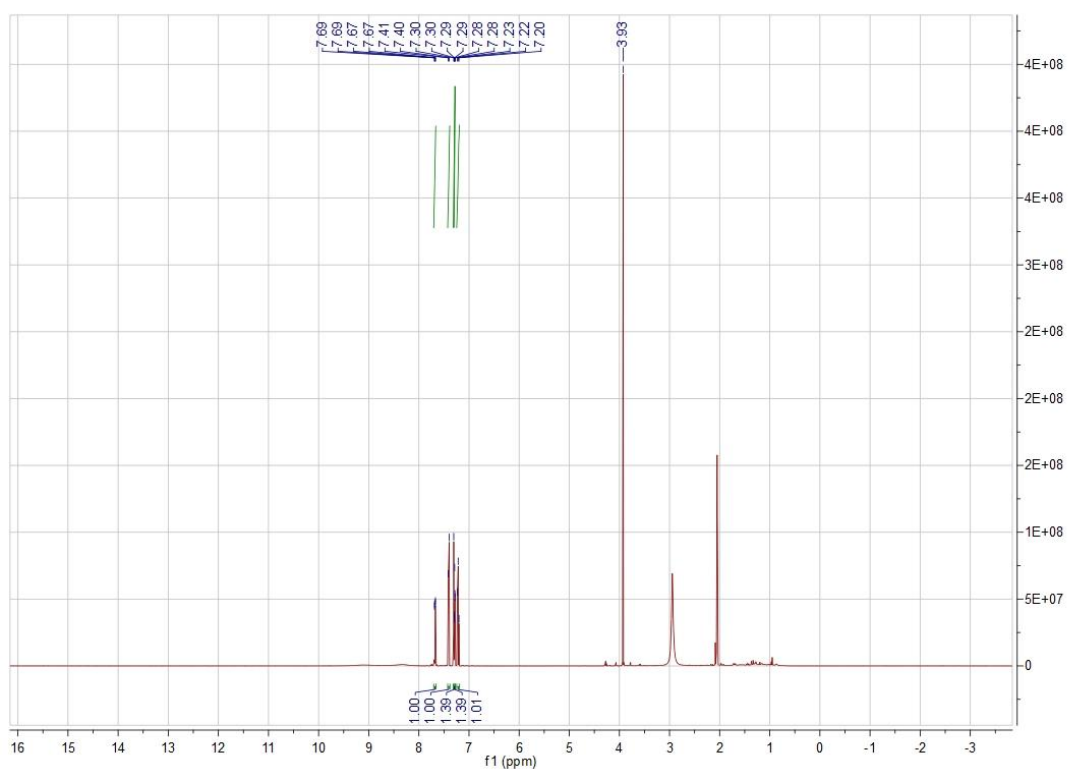

Figure S16.  $^1\text{H-NMR}$  spectrum of compound 12.

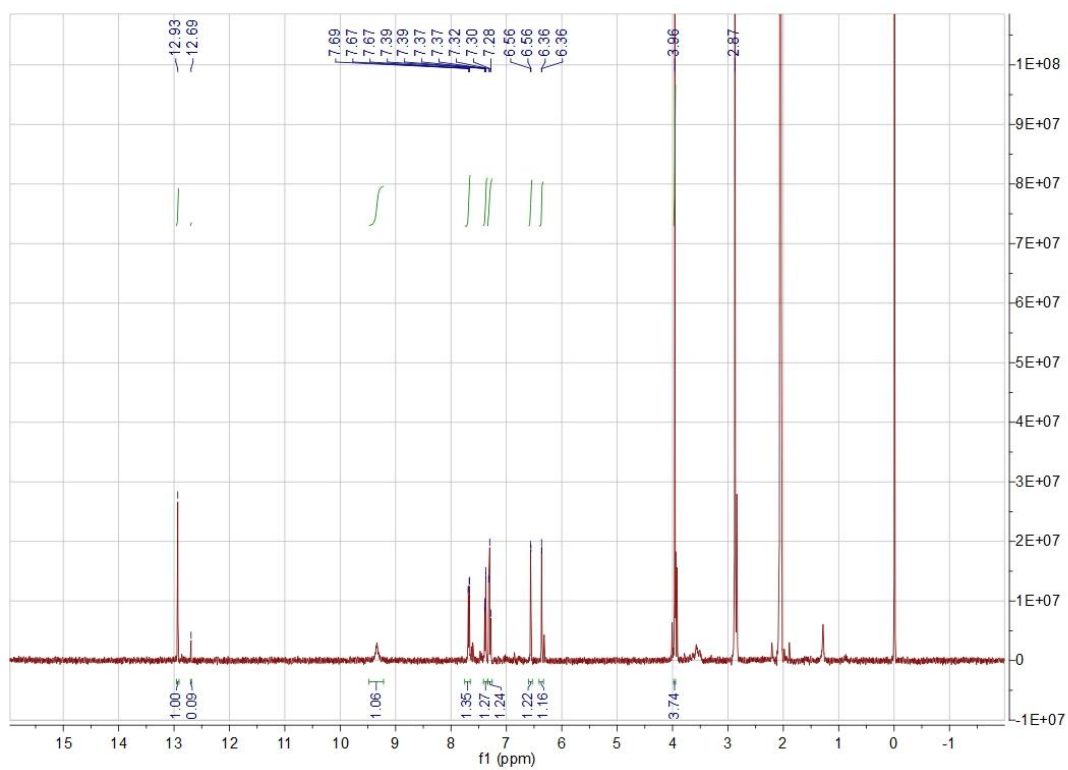

Figure S17.  $^1\text{H-NMR}$  spectrum of compound 13.

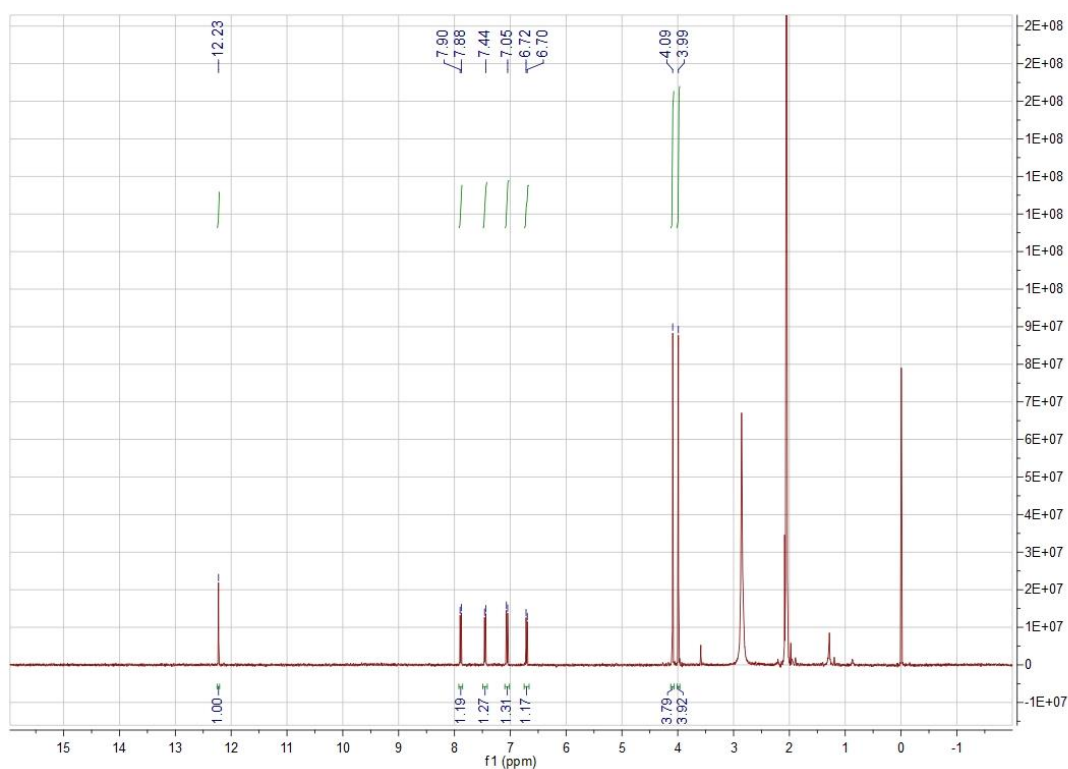

Figure S18. <sup>1</sup>H-NMR spectrum of compound 14.

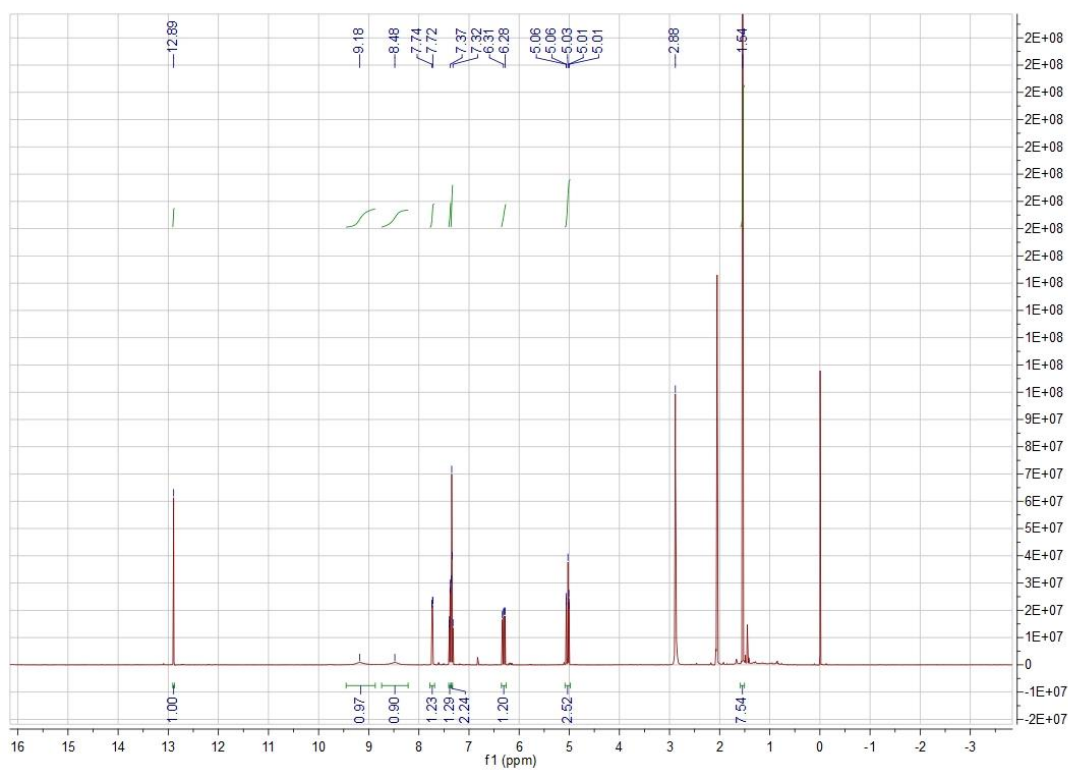

Figure S19. <sup>1</sup>H-NMR spectrum of compound 15.

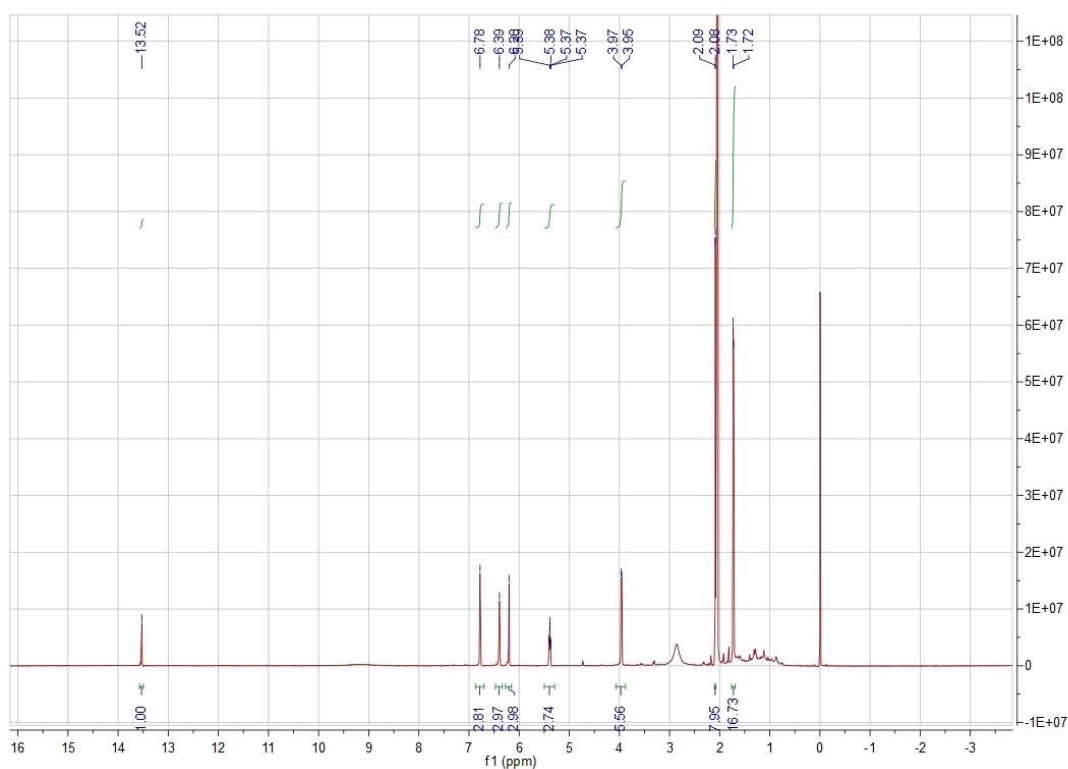

Figure S20.  $^1\text{H}$ -NMR spectrum of compound 16.

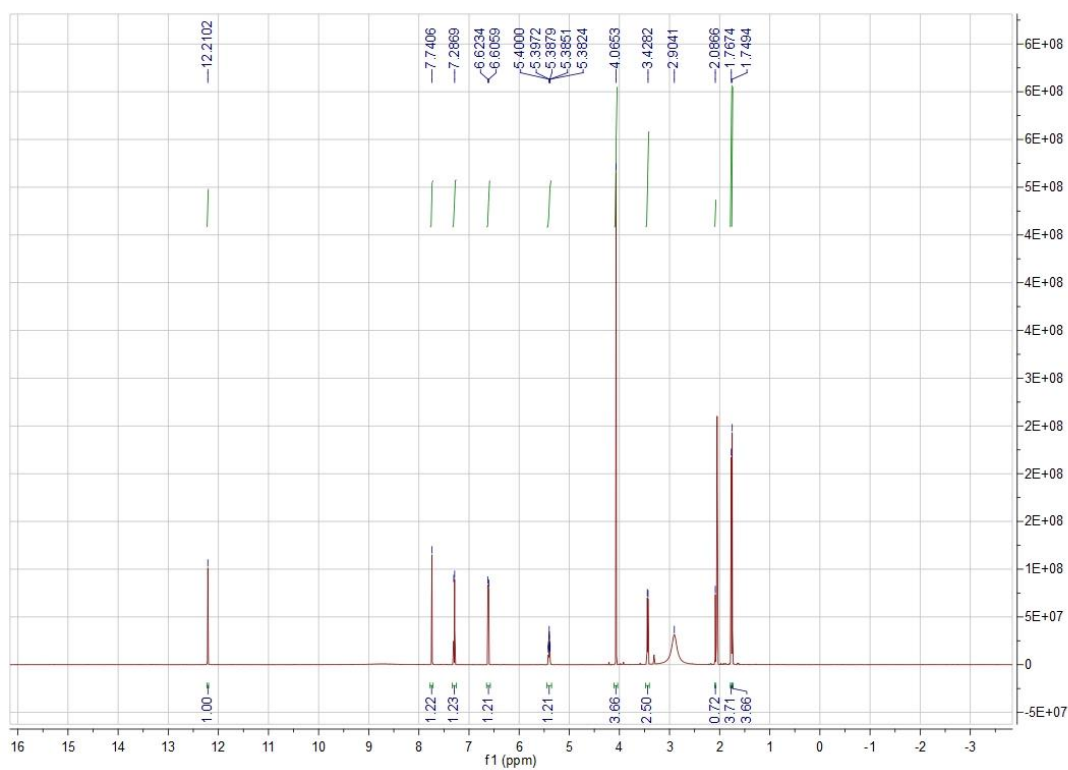

Figure S21.  $^1\text{H}$ -NMR spectrum of compound 17.

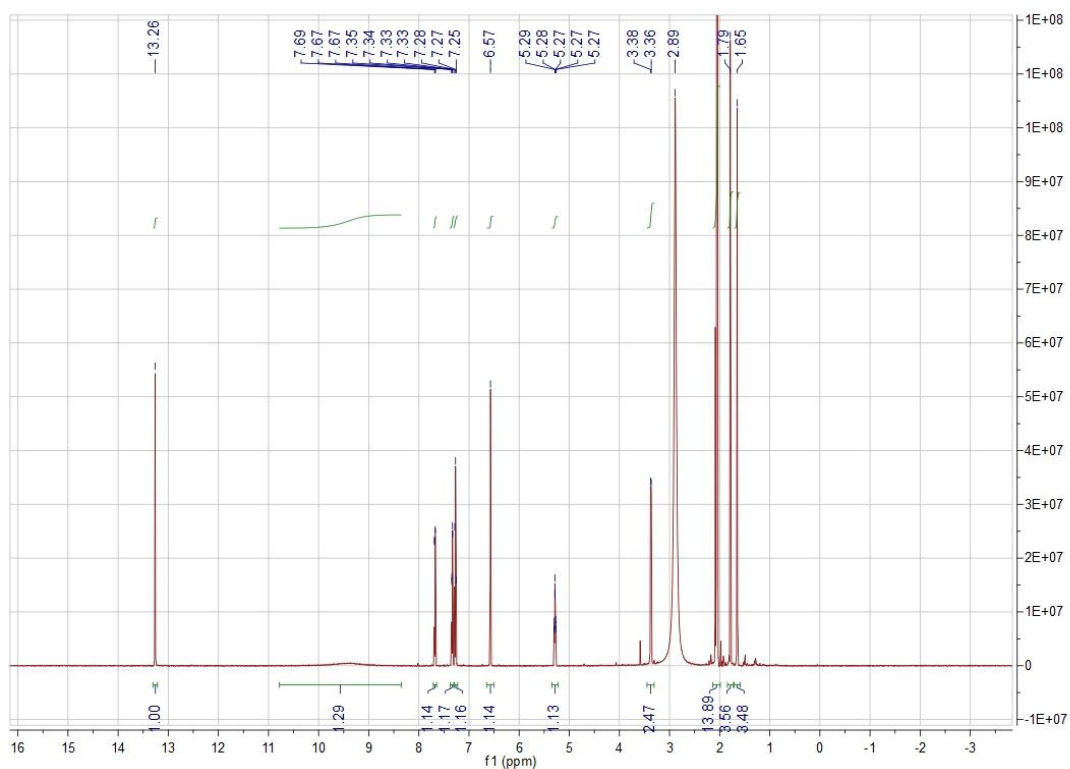

Figure S22.  $^1\text{H-NMR}$  spectrum of compound 18.

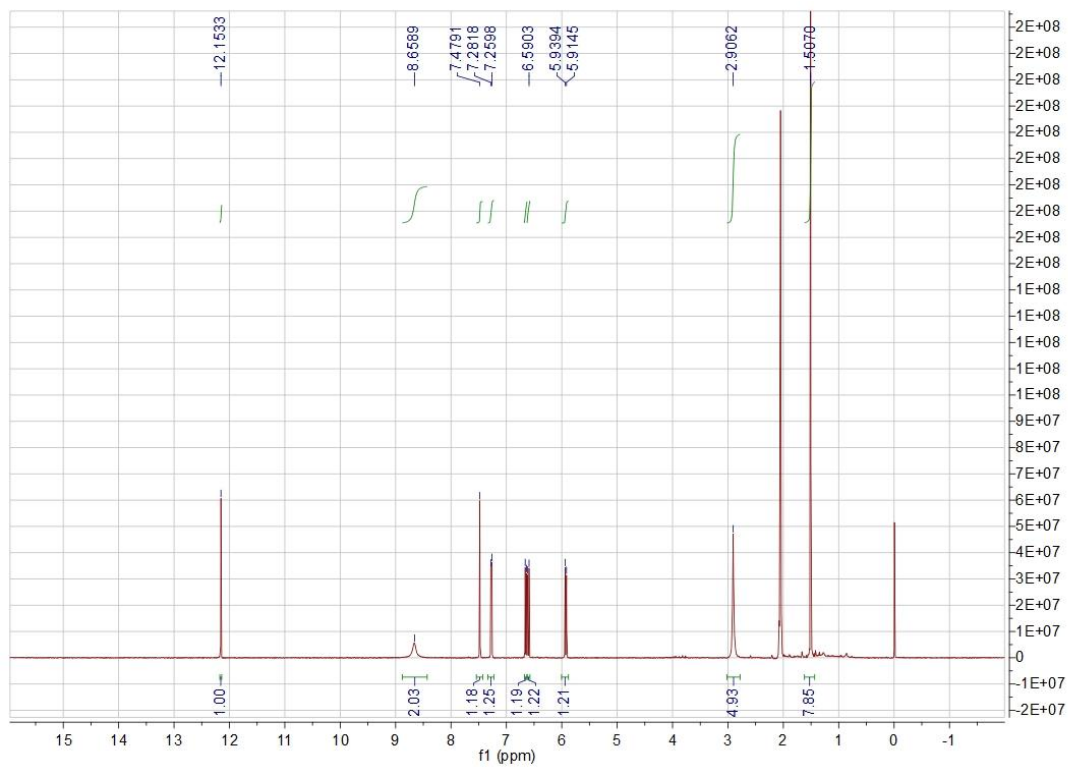

Figure S23.  $^1\text{H-NMR}$  spectrum of compound 19.

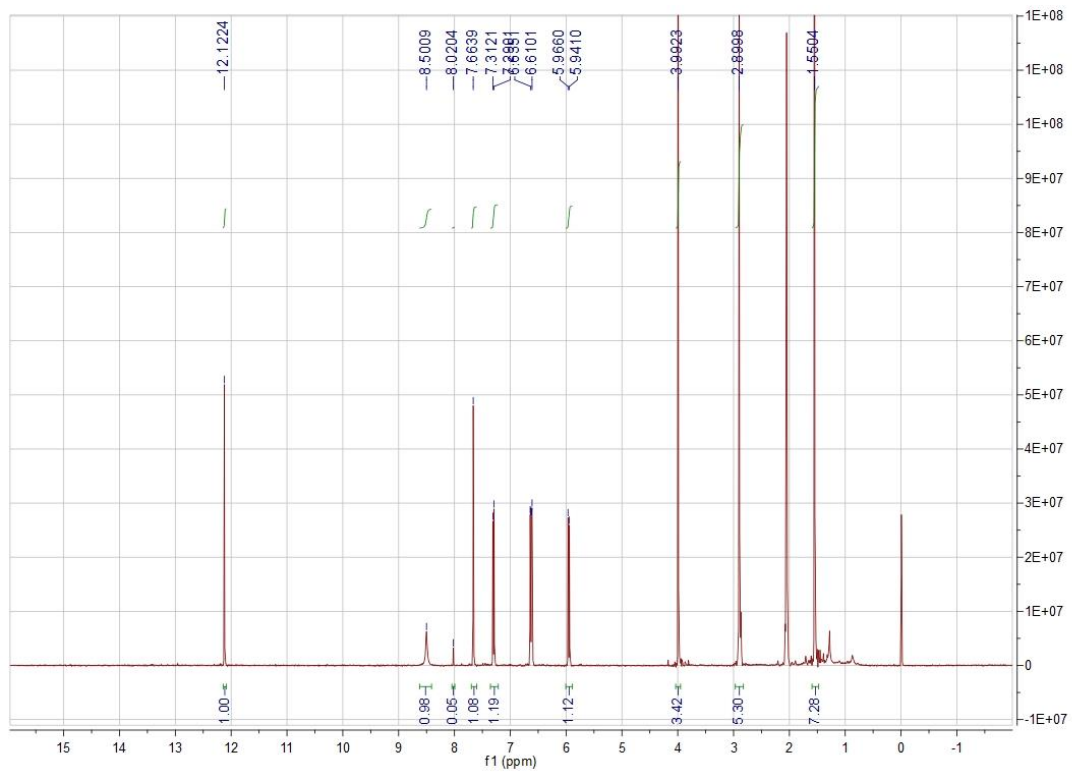

Figure S24. <sup>1</sup>H-NMR spectrum of compound 20.

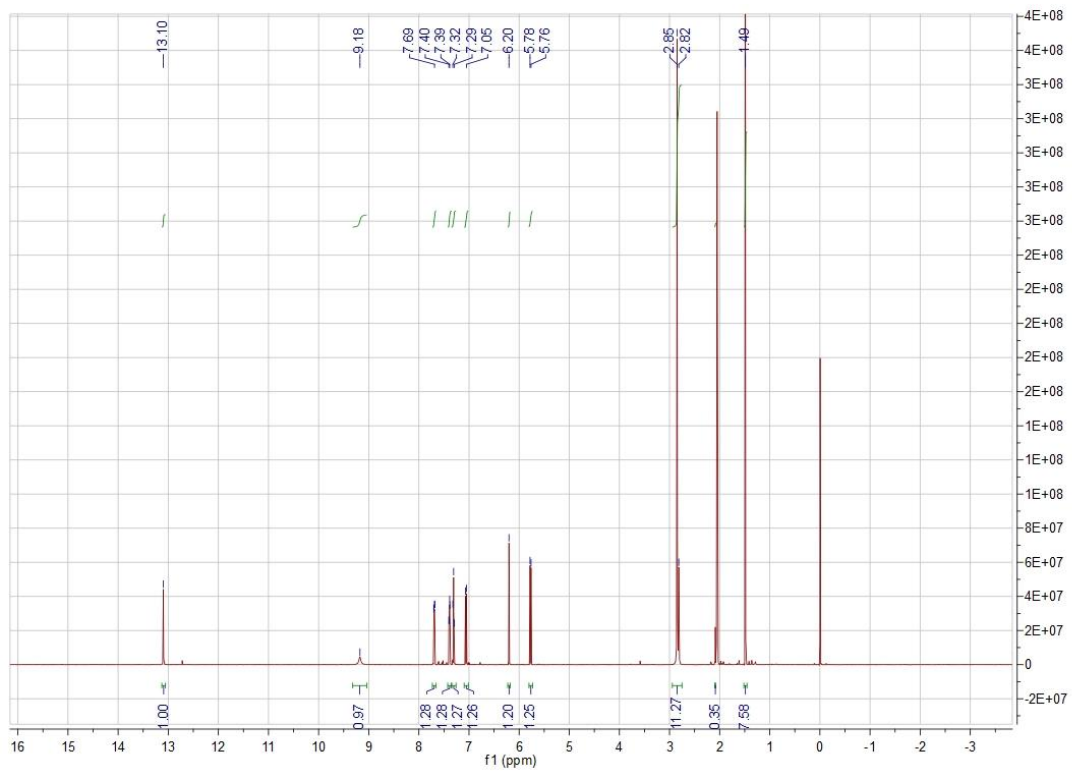

Figure S25. <sup>1</sup>H-NMR spectrum of compound 21.

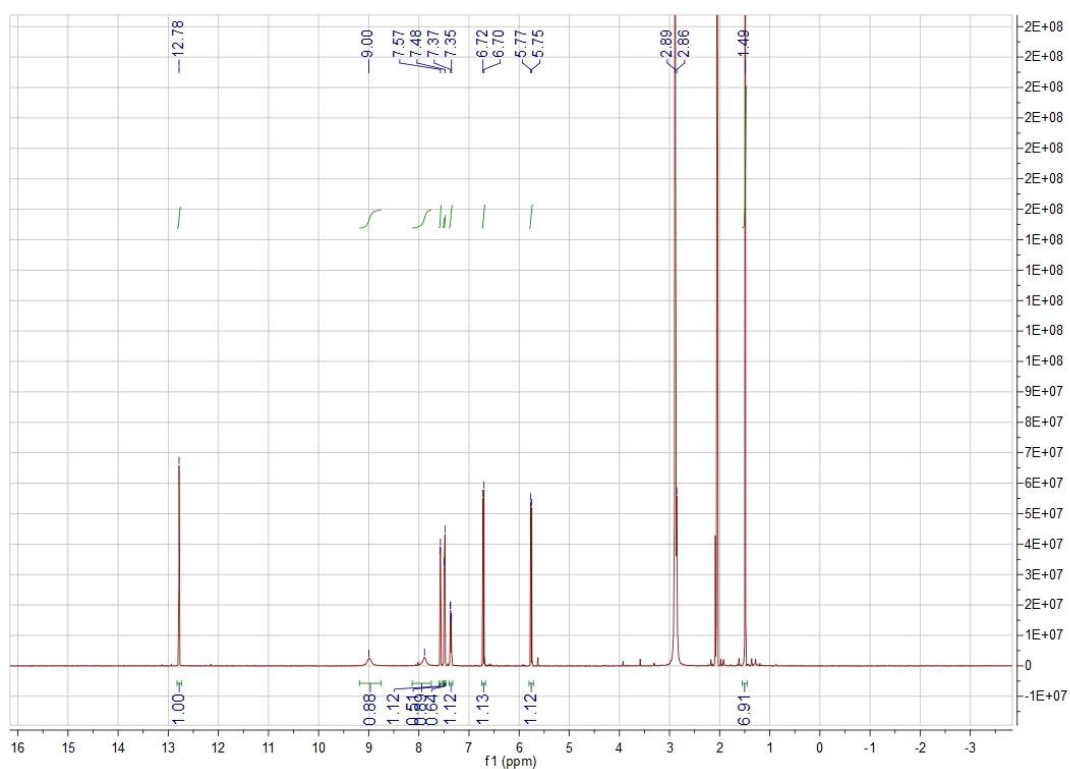

Figure S26.  $^1\text{H-NMR}$  spectrum of compound 22.

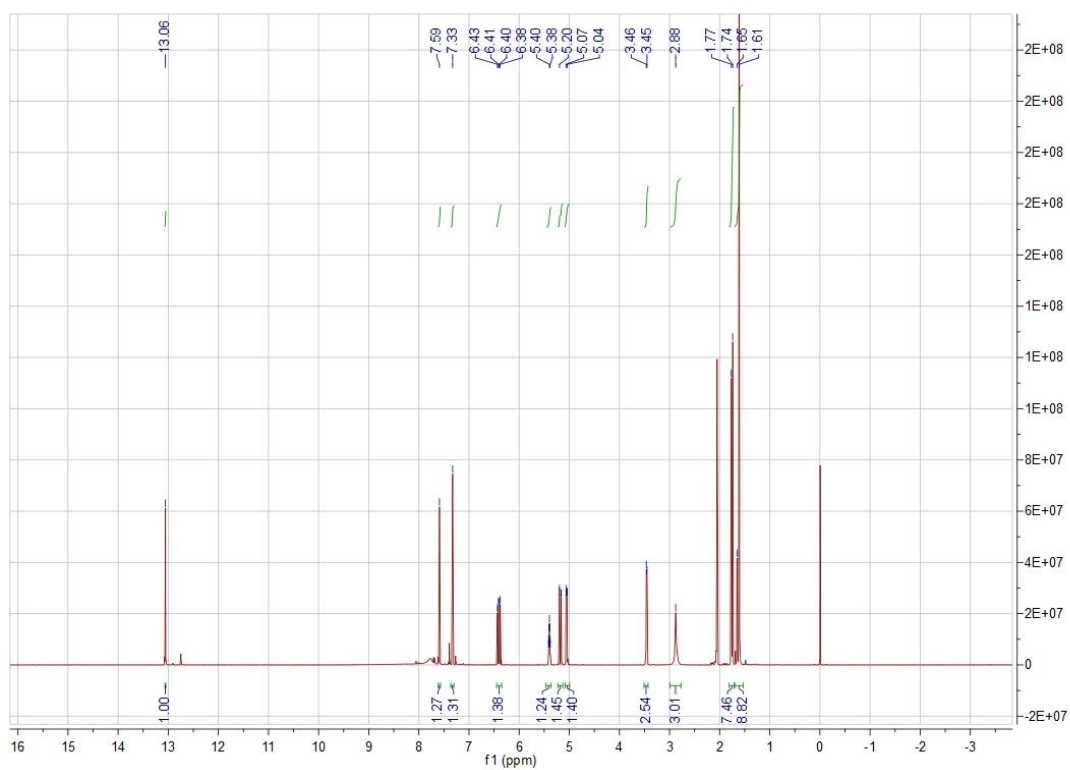

Figure S27.  $^1\text{H-NMR}$  spectrum of compound 23.

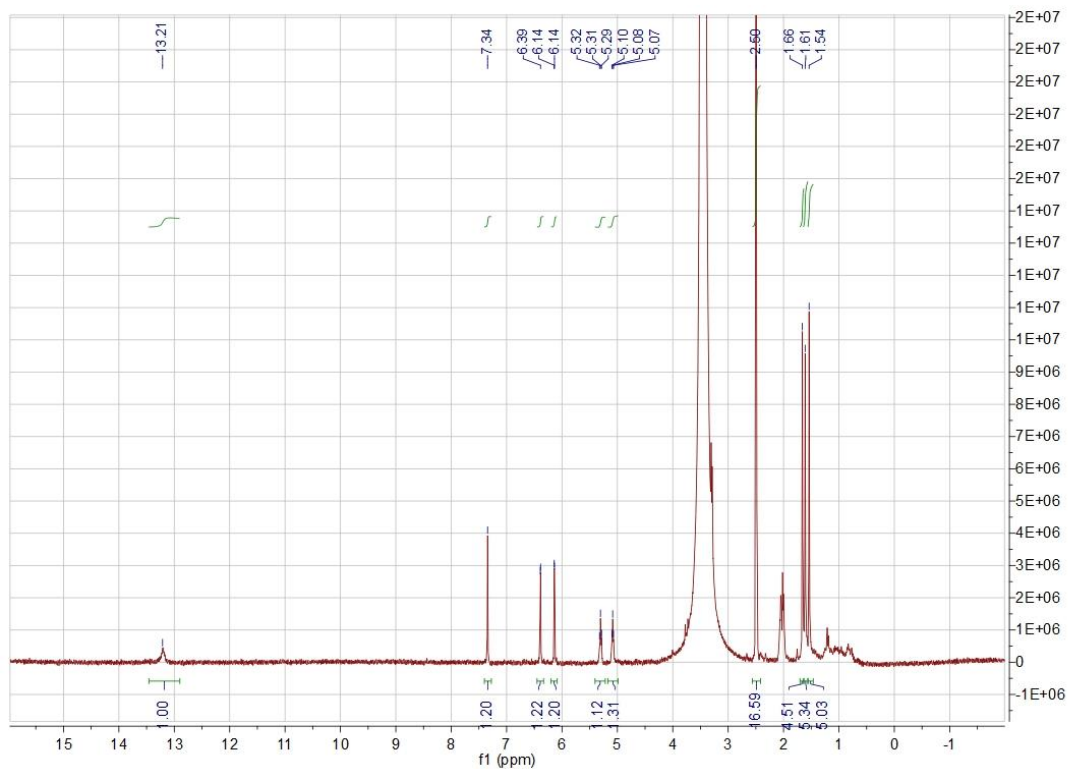

Figure S28.  $^1\text{H-NMR}$  spectrum of compound 24.

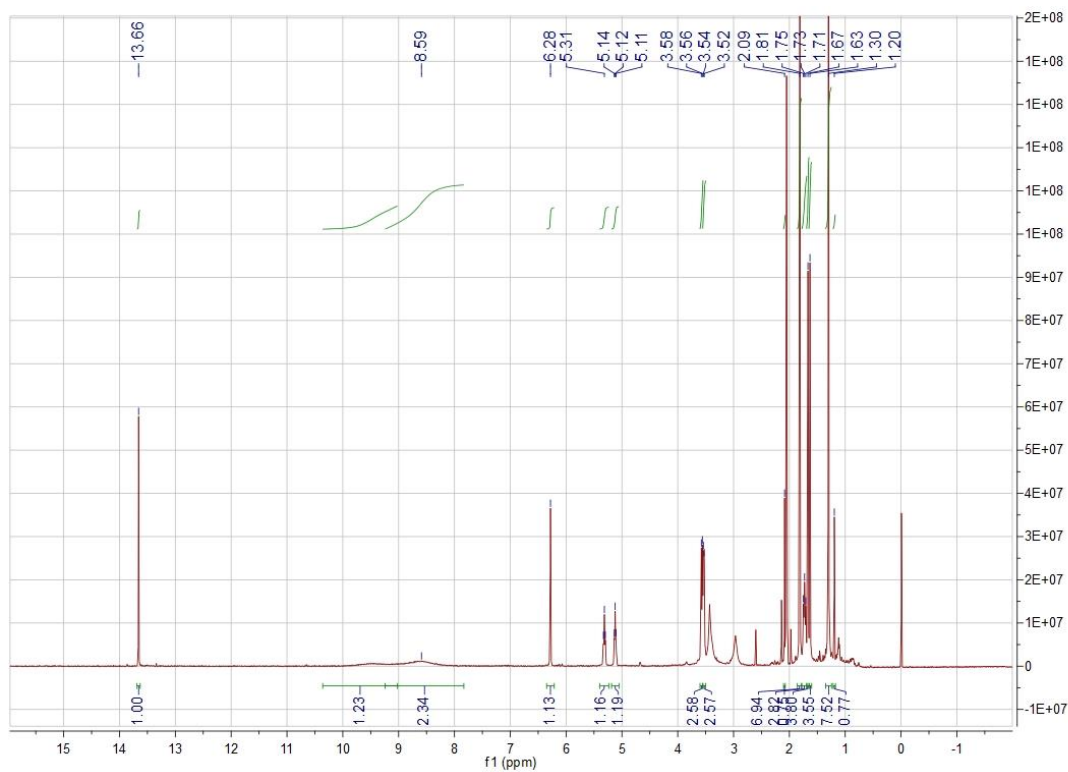

Figure S29.  $^1\text{H-NMR}$  spectrum of compound 25.

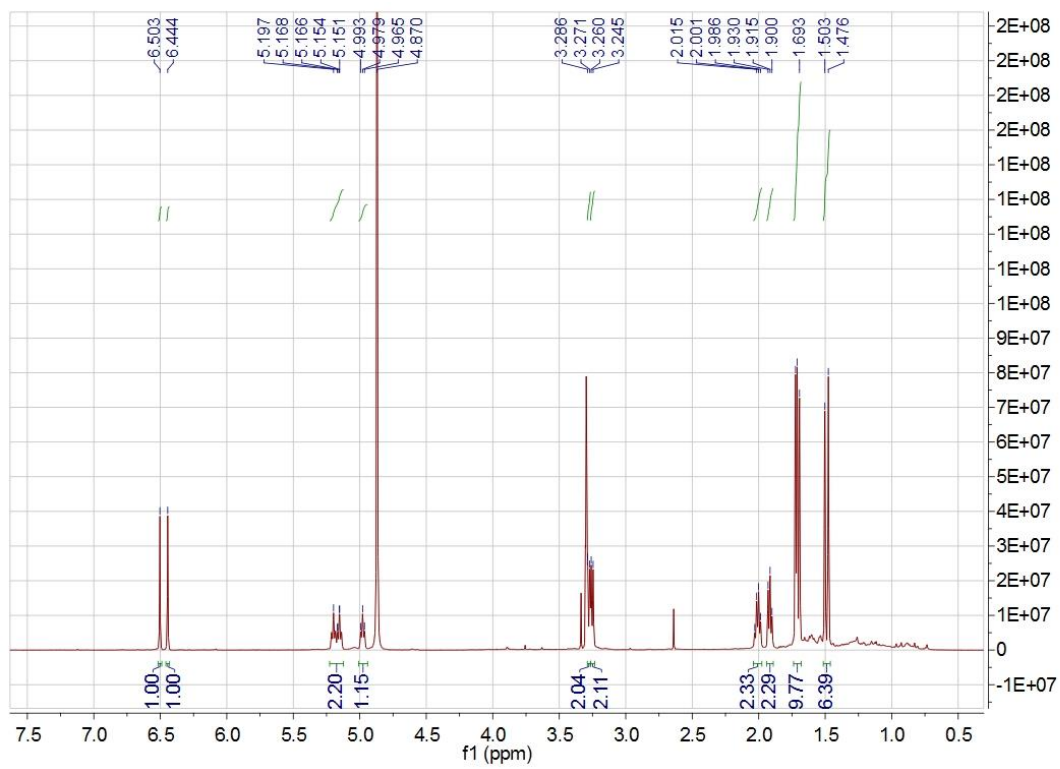

Figure S30. <sup>1</sup>H-NMR spectrum of compound 26.



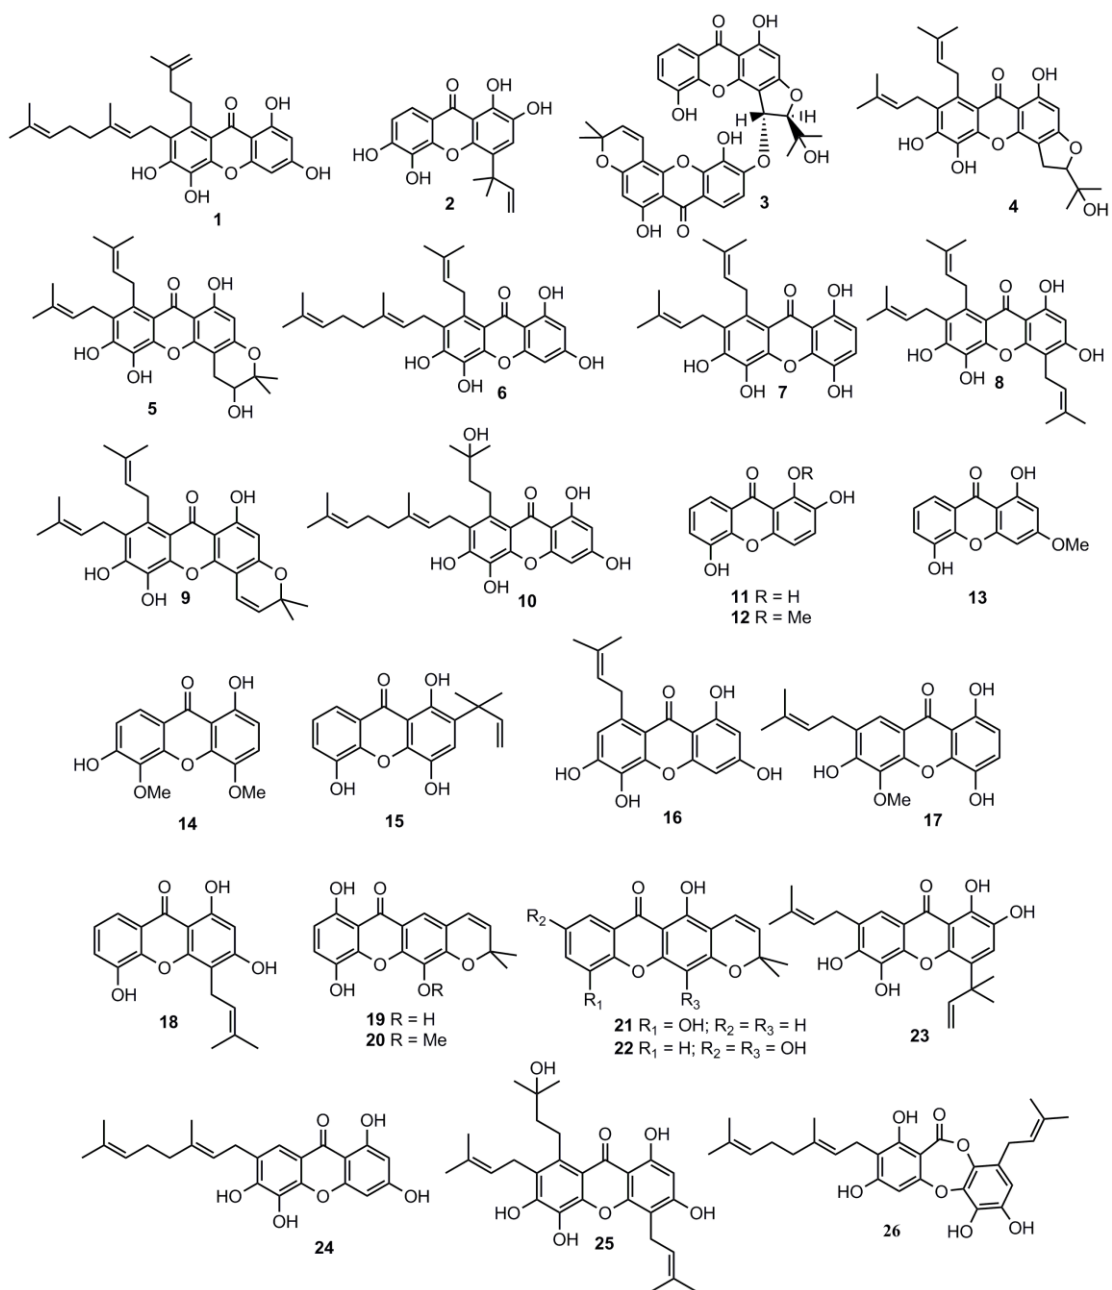

Figure S31. Structures of compounds 1-26.
